# Supplementary material for: Dual effects of daily FTY720 on human astrocytes in vitro: relevance for neuroinflammation
Source: PubMed Central journal article supplement (PMC3621211; doi:10.1186/1742-2094-10-41), 2013-03-19

**Additional file 3**

Pretreatment - S - S  
Stimulation - - F F

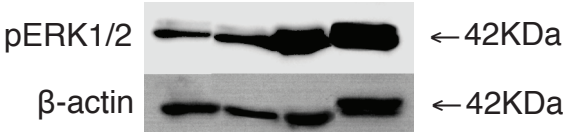

Supplement: 1742-2094-10-41-S3.pdf [file 1742-2094-10-41-S3.pdf]
